# Supplementary material for: A Novel Hydrophilic, Antibacterial Chitosan-Based Coating Prepared by Ultrasonic Atomization Assisted LbL Assembly Technique
Source: MDPI journal article supplement (doi:10.3390/jfb14010043), 2023-01-12
Supplement: s1 [file s1]

# A Novel Hydrophilic, Antibacterial Chitosan-Based Coating Prepared by Ultrasonic Atomization Assisted LbL Assembly Technique

Xiaoyu Wang <sup>1,†</sup>, Yuyang Zhou <sup>2,3,†</sup>, Melissa Johnson <sup>1</sup>, Cameron Milne <sup>1</sup>, Sigen A <sup>1</sup>, Yening Li <sup>2</sup>, Wenxin Wang <sup>1</sup>, Nan Zhang <sup>2,\*</sup> and Qian Xu <sup>1,\*</sup>

<sup>1</sup> Charles Institute of Dermatology, School of Medicine, University College Dublin, D04 V1W8 Dublin, Ireland

<sup>2</sup> Centre of Micro/Nano Manufacturing Technology (MNMT-Dublin), School of Mechanical and Materials Engineering, University College Dublin, D04 KW52 Dublin, Ireland

<sup>3</sup> National Engineering Laboratory for Modern Silk, College of Textile and Clothing Engineering, Soochow University, Suzhou 215123, China

\* Correspondence: nan.zhang@ucd.ie (N.Z.); qian.xu@ucd.ie (Q.X.)

† These authors contributed equally to this work.

## Contents

Supplementary table S1, S2

References

**Table S1.** Element analysis results of CTS-CHO.

| Sample                      | C (%) | N (%) | H (%) | Oxidation Degree<br>(OD, %) |
|-----------------------------|-------|-------|-------|-----------------------------|
| Chitosan (CTS)              | 41.64 | 7.22  | 6.49  | N/A                         |
| Aldehyde chitosan (CTS-CHO) | 37.81 | 5.27  | 5.5   | 12.53                       |

**Table S2.** Zeta potential results of CTS solution and CTS-CHO solution.

| Sample                                        | Zeta Potential (mv) |
|-----------------------------------------------|---------------------|
| 1 mg/mL chitosan (CTS) solution               | 10.9                |
| 10 mg/mL aldehyde chitosan (CTS-CHO) solution | 28.8                |
